# Supplementary material
Source: PubMed Central journal article supplement (PMC11032172)
Supplement: NIHMS1983335-supplement-Online_Supplement.pdf [file NIHMS1983335-supplement-Online_Supplement.pdf]

## SUPPLEMENTAL MATERIAL

### Epidemiology of Shock in Contemporary Cardiac Intensive Care Units: Data from the Critical Care Cardiology Trials Network (CCCTN) Registry

David D. Berg, M.D.<sup>1</sup> Erin A. Bohula, M.D., D.Phil.,<sup>1</sup> Sean van Diepen, M.D., M.Sc.,<sup>2</sup> Jason N. Katz, M.D., M.H.S.,<sup>3</sup> Carlos L. Alviar, M.D.,<sup>4</sup> Vivian M. Baird-Zars, M.P.H.,<sup>1</sup> Christopher F. Barnett, M.D., M.P.H.,<sup>5</sup> Gregory W. Barsness, M.D.,<sup>6</sup> James A. Burke, M.D.,<sup>7</sup> Paul C. Cremer, M.D.,<sup>8</sup> Jennifer Cruz, D.O.,<sup>9</sup> Lori B. Daniels, M.D., M.A.S.,<sup>10</sup> Andrew DeFilippis, M.D., M.Sc.,<sup>11</sup> Affan Haleem, M.D.,<sup>7</sup> Steven Hollenberg, M.D.,<sup>9</sup> James M. Horowitz, M.D.,<sup>12</sup> Norma Keller, M.D.,<sup>12</sup> Michael C. Kontos, M.D.,<sup>13</sup> Patrick R. Lawler, M.D., M.P.H.,<sup>14</sup> Venu Menon, M.D.,<sup>8</sup> Thomas S. Metkus, M.D.,<sup>15</sup> Jason Ng, M.D.,<sup>12</sup> Ryan Orgel, M.D.,<sup>3</sup> Christopher B. Overgaard, M.D., M.Sc.,<sup>14</sup> Jeong-Gun Park, Ph.D.,<sup>1</sup> Nicholas Phreaner, M.D.,<sup>10</sup> Robert O. Roswell, M.D.,<sup>12</sup> Steven P. Schulman, M.D.,<sup>15</sup> R. Jeffrey Snell, M.D.,<sup>16</sup> Michael A. Solomon, M.D.,<sup>17</sup> Bradley Ternus, M.D.,<sup>6</sup> Wayne Tymchak, M.D.,<sup>2</sup> Fnu Vikram, M.D.,<sup>7</sup> David A. Morrow, M.D., M.P.H.<sup>1</sup>

<sup>1</sup>Levine Cardiac Intensive Care Unit, TIMI Study Group, Cardiovascular Division, Department of Medicine, Brigham and Women's Hospital and Harvard Medical School, Boston, MA

<sup>2</sup>Department of Critical Care and Division of Cardiology, Department of Medicine, University of Alberta, Edmonton, Alberta, Canada

<sup>3</sup>Divisions of Cardiology and Pulmonary and Critical Care Medicine, University of North Carolina, Center for Heart and Vascular Care Chapel Hill, Chapel Hill, North Carolina

<sup>4</sup>University of Florida, Gainesville, FL

<sup>5</sup>Department of Cardiology, Medstar Washington Hospital Center, Washington, DC

<sup>6</sup>Mayo Clinic, Rochester, MN

<sup>7</sup>Lehigh Valley Health Network, Allentown, PA

<sup>8</sup>Cleveland Clinic Foundation, Cleveland, OH

<sup>9</sup>Cooper University Hospital, Camden, NJ

<sup>10</sup>Sulpizio Cardiovascular Center, University of California San Diego, La Jolla, CA

<sup>11</sup>University of Louisville, Louisville, KY

<sup>12</sup>New York University Langone Health, New York, NY

<sup>13</sup>Virginia Commonwealth University, Richmond, VA

<sup>14</sup>Peter Munk Cardiac Centre, Toronto General Hospital, University of Toronto, Toronto, ON Canada

<sup>15</sup>Johns Hopkins Hospital, Baltimore, MD

<sup>16</sup>Rush University Medical Center, Chicago, IL

<sup>17</sup>Critical Care Medicine Department, National Institutes of Health Clinical Center, Bethesda, MD

#### Address for Correspondence:

David A. Morrow, M.D., M.P.H.

TIMI Study Group

60 Fenwood Road

Suite 7022

Boston, MA 02115

[dmorrow@bwh.harvard.edu](mailto:dmorrow@bwh.harvard.edu)

## **Supplemental Table 1. CCCTN Leadership and Investigators.**

### **EXECUTIVE COMMITTEE**

David A. Morrow, MD MPH, Jason N. Katz, MD MHS, Sean van Diepen, MD MSc.

### **STEERING COMMITTEE**

Gregory W. Barsness, MD, Christopher B. Granger, MD, Steven M. Hollenberg, MD, James D. Horowitz, MD, Venu Menon, MD, Robert O. Roswell, MD, Michael A. Solomon, MD.

### **CCCTN DATA COORDINATING CENTER (TIMI STUDY GROUP)**

Marc S. Sabatine, MD MPH (TIMI Study Group Chairman), David A. Morrow, MD MPH (TIMI Principal Investigator), Erin A. Bohula, MD DPhil (Co-Investigator), David D. Berg, MD (Co-Investigator), Vivian Baird-Zars, MPH (Project Manager/Data Manager), Sabina A. Murphy, MPH (Director of Statistics), Cardiovascular Division, Department of Medicine, Brigham and Women's Hospital, Boston, MA.

### **COLLABORATING ENROLLING CENTERS**

**Brigham and Women's Hospital**, Boston, MA: E Bohula (PI), D Morrow (Co-Investigator), D Silva (Research Coordinator).

**Cleveland Clinic Foundation**, Cleveland, OH: V Menon (PI), P Cremer (Investigator), A Schenone (Sub-I), K Rutkowski (Nurse Coordinator).

**Cooper University Hospital**, Camden, NJ: S Hollenberg (PI), J Cruz (Sub-I), D Ricketti, J Trujillo (Research Coordinators).

**Johns Hopkins Hospital**, Baltimore, MD: S Schulman (PI), T Metkus (Sub-I), K Ibrahim, F Rahman (Research fellows).

**Lehigh Valley Health Network**, Allentown, PA: J Burke (PI), F Vikram, A Haleem (Sub-Is), K Cornell (Research Coordinator).

**Mayo Clinic**, Rochester, MN: G Barsness (PI), J Jentzer, B Ternus (Sub-Is).

**Medstar Washington Hospital Center**, Washington, DC: C Barnett (PI), S Ahmed, L Barrett, S Pokharel (Research Coordinators).

**New York University Langone Health**, New York, NY: N Keller (PI), R Roswell (PI), J Ng (Sub-I).

**Rush University Medical Center**, Chicago, IL: J Snell (PI), I Atallah, N Jahan, K Jones (Research Coordinators).

**Toronto General Hospital, University of Toronto**, Toronto, ON Canada: P Lawler (PI), K Tsang (Research Coordinator).

**University of Alberta**, Edmonton, Alberta, Canada: S van Diepen (PI), W Tymchak (Co-PI), N Hogg (Research Coordinator).

**University of Florida**, Gainesville, FL: C Alviar (PI), G Bhattal, N Gargus, D Leach (Sub-Is), S Long (Primary coordinator), J Bostick, M Mohammed (Research Coordinators).

**University of California San Diego**, La Jolla, CA: L Daniels (PI), N Phreaner (Sub-I), P Anzenberg, C Belza, T Getz, J Gonzalez, J Marsal R Sedighi, A Toomu, S Toomu (Research Coordinators).

**University of Louisville**, Louisville, KY: A DeFilippis (PI), S Vincent (Study nurse).

**University of North Carolina**, Chapel Hill, NC: J Katz (PI), C Dangerfield, R Orgel (Sub-Is), Z Ozen, E Prosser (Investigators), T Wade (Research Coordinator).

**Virginia Commonwealth University**, Richmond, VA: M Kontos (PI), S Dow, C Vo (Sub-Is).

**Supplemental Table 2a. Baseline characteristics by general etiology of shock.**

|                                         | <b>Cardiogenic,<br/>% (n)</b> | <b>Distributive,<br/>% (n)</b> | <b>Hypovolemic,<br/>% (n)</b> | <b>Mixed,<br/>% (n)</b> |
|-----------------------------------------|-------------------------------|--------------------------------|-------------------------------|-------------------------|
|                                         | <b>N=450</b>                  | <b>N=49</b>                    | <b>N=20</b>                   | <b>N=132</b>            |
| <i>Demographics</i>                     |                               |                                |                               |                         |
| Age, median (IQR), years                | 64 (55 – 74)                  | 64 (54 – 73)                   | 67 (58 – 75)                  | 65 (54 – 75)            |
| Female sex                              | 36.2 (163)                    | 34.7 (17)                      | 30.0 (6)                      | 37.1 (49)               |
| White race                              | 68.9 (272)                    | 65.1 (28)                      | 63.2 (12)                     | 66.7 (74)               |
| Weight, median (IQR), kg                | 82 (69 – 96)                  | 80 (64 – 93)                   | 81 (68 – 101)                 | 82 (68 – 98)            |
| BMI, median (IQR), kg/m <sup>2</sup>    | 28 (24 – 32)                  | 26 (23 – 31)                   | 31 (23 – 34)                  | 28 (24 – 34)            |
| <i>Cardiovascular Comorbidities</i>     |                               |                                |                               |                         |
| Current smoker                          | 16.9 (75)                     | 14.6 (7)                       | 15.0 (3)                      | 11.5 (15)               |
| Diabetes mellitus                       | 40.0 (180)                    | 32.7 (16)                      | 60.0 (12)                     | 44.7 (59)               |
| Hypertension                            | 59.1 (266)                    | 69.4 (34)                      | 65.0 (13)                     | 60.6 (80)               |
| Coronary artery disease                 | 42.7 (192)                    | 49.0 (24)                      | 45.0 (9)                      | 47.0 (62)               |
| Cerebrovascular disease                 | 8.9 (40)                      | 12.2 (6)                       | 10.0 (2)                      | 7.6 (10)                |
| Peripheral artery disease               | 10.2 (46)                     | 12.2 (6)                       | 15.0 (3)                      | 11.4 (15)               |
| Prior heart failure                     | 51.3 (231)                    | 46.9 (23)                      | 65.0 (13)                     | 54.5 (72)               |
| Historical LVEF                         |                               |                                |                               |                         |
| ≥50%                                    | 11.1 (25)                     | 19.0 (4)                       | 41.7 (5)                      | 19.7 (13)               |
| 40-<50%                                 | 7.1 (16)                      | 0.0 (0)                        | 8.3 (1)                       | 4.5 (3)                 |
| 30-<40%                                 | 11.1 (25)                     | 4.8 (1)                        | 8.3 (1)                       | 15.2 (10)               |
| 20-<30%                                 | 29.6 (67)                     | 47.6 (10)                      | 8.3 (1)                       | 31.8 (21)               |
| <20%                                    | 41.2 (93)                     | 28.6 (6)                       | 33.3 (4)                      | 28.8 (19)               |
| Prior heart transplant                  | 0.9 (4)                       | 6.1 (3)                        | 0.0 (0)                       | 3.8 (5)                 |
| Atrial fibrillation                     | 23.3 (105)                    | 22.4 (11)                      | 50.0 (10)                     | 27.3 (36)               |
| Ventricular arrhythmia                  | 9.6 (43)                      | 8.2 (4)                        | 5.0 (1)                       | 8.3 (11)                |
| Severe valvular disease                 | 11.6 (52)                     | 10.2 (5)                       | 20.0 (4)                      | 26.5 (35)               |
| Pulmonary hypertension                  | 7.1 (32)                      | 6.1 (3)                        | 5.0 (1)                       | 3.8 (5)                 |
| Congenital heart disease                | 1.3 (6)                       | 4.1 (2)                        | 5.0 (1)                       | 3.0 (4)                 |
| <i>Non-cardiovascular comorbidities</i> |                               |                                |                               |                         |
| Chronic kidney disease                  | 32.0 (144)                    | 22.4 (11)                      | 45.0 (9)                      | 35.6 (47)               |
| On dialysis                             | 14.6 (21)                     | 36.4 (4)                       | 55.6 (5)                      | 42.6 (20)               |
| Significant pulmonary disease           | 16.4 (74)                     | 32.7 (16)                      | 20.0 (4)                      | 13.6 (18)               |
| Significant liver disease               | 4.2 (19)                      | 4.1 (2)                        | 5.0 (1)                       | 6.8 (9)                 |

Categorical variables are shown as percentages with counts in parentheses. Continuous variables are shown as medians and interquartile ranges. Patients with unknown etiology of shock (n=26) are not included. BMI indicates body mass index; IQR, interquartile range; kg, kilograms; kg/m<sup>2</sup>, kilograms per meter-squared; LVEF, left ventricular ejection fraction.

**Supplemental Table 2b. Presenting features, ICU resource utilization, and outcomes by general etiology of shock.**

|                                                | <b>Cardiogenic,<br/>% (n)<br/>N=450</b> | <b>Distributive,<br/>% (n)<br/>N=49</b> | <b>Hypovolemic,<br/>% (n)<br/>N=20</b> | <b>Mixed,<br/>% (n)<br/>N=132</b> |
|------------------------------------------------|-----------------------------------------|-----------------------------------------|----------------------------------------|-----------------------------------|
| <i>Clinical features/illness severity</i>      |                                         |                                         |                                        |                                   |
| SOFA score                                     | 8 (5 – 11)                              | 9 (6 – 12)                              | 7 (4 – 10)                             | 10 (6 – 13)                       |
| <i>“Worst” lab values</i>                      |                                         |                                         |                                        |                                   |
| Lactate, median (IQR), mmol/L                  | 3.1 (1.9 – 6.5)                         | 3.8 (2.1 – 6.7)                         | 2.9 (1.9 – 7.0)                        | 4.2 (2.4 – 8.1)                   |
| Lactate >2 mmol/L                              | 69.7 (260)                              | 80.0 (36)                               | 68.4 (13)                              | 81.1 (103)                        |
| Arterial pH, median (IQR)                      | 7.34 (7.21 – 7.43)                      | 7.31 (7.19 – 7.38)                      | 7.37 (7.04 – 7.38)                     | 7.29 (7.21 – 7.40)                |
| Arterial pH <7.25                              | 31.1 (92)                               | 41.2 (14)                               | 36.4 (4)                               | 35.3 (36)                         |
| eGFR, median (IQR), mL/min/1.73 m <sup>2</sup> | 38 (20 – 57)                            | 44 (20 – 71)                            | 45 (14 – 68)                           | 31 (14 – 45)                      |
| eGFR <60 mL/min/1.73 m <sup>2</sup>            | 77.4 (322)                              | 65.3 (32)                               | 70.0 (14)                              | 83.3 (105)                        |
| ALT, median (IQR), U/L                         | 64 (29 – 295)                           | 54 (25 – 182)                           | 23 (14 – 43)                           | 73 (30 – 370)                     |
| AST, median (IQR), U/L                         | 113 (37 – 473)                          | 81 (35 – 325)                           | 31 (18 – 115)                          | 112 (40 – 664)                    |
| Total bilirubin, median (IQR), mg/dL           | 1.2 (0.7 – 1.9)                         | 1.0 (0.6 – 1.6)                         | 0.7 (0.4 – 1.0)                        | 1.3 (0.7 – 2.7)                   |
| Platelets, median (IQR), K/uL                  | 138 (98 – 200)                          | 127 (98 – 200)                          | 129 (87 – 199)                         | 116 (62 – 174)                    |
| INR, median (IQR)                              | 1.4 (1.2 – 2.0)                         | 1.6 (1.3 – 2.4)                         | 1.4 (1.3 – 1.8)                        | 1.7 (1.3 – 2.8)                   |
| <i>ICU resource utilization</i>                |                                         |                                         |                                        |                                   |
| Days of ICU care, median (IQR)                 | 4.2 (2.2 – 8.4)                         | 5.3 (2.7 – 10.6)                        | 3.6 (1.7 – 6.6)                        | 5.8 (2.9 – 10.0)                  |
| Mechanical ventilation                         | 49.6 (223)                              | 59.2 (29)                               | 50.0 (10)                              | 65.9 (87)                         |
| Renal replacement therapy                      | 14.7 (66)                               | 12.2 (6)                                | 15.0 (3)                               | 26.5 (35)                         |
| Invasive monitoring                            | 68.9 (310)                              | 63.3 (31)                               | 70.0 (14)                              | 67.4 (89)                         |
| Central venous line                            | 46.9 (211)                              | 55.1 (27)                               | 65.0 (13)                              | 54.5 (72)                         |
| Pulmonary artery catheter                      | 36.0 (162)                              | 20.4 (10)                               | 30.0 (6)                               | 31.1 (41)                         |
| Arterial line                                  | 52.4 (236)                              | 51.0 (25)                               | 55.0 (11)                              | 59.8 (79)                         |
| <i>Management of shock</i>                     |                                         |                                         |                                        |                                   |
| No. of vasoactive medications, median (IQR)    | 1 (1 – 2)                               | N/A*                                    | N/A*                                   | 2 (1 – 3)                         |
| Mechanical circulatory support                 | 36.7 (165)                              | 6.1 (3)                                 | 15.0 (3)                               | 22.7 (30)                         |
| <i>Outcomes</i>                                |                                         |                                         |                                        |                                   |
| CICU mortality                                 | 28.9 (24.7 – 33.3)                      | 20.4 (10.2 – 34.3)                      | 15.0 (3.2 – 37.9)                      | 28.8 (21.2 – 37.3)                |
| In-hospital mortality                          | 32.2 (27.9 – 36.8)                      | 30.6 (18.3 – 45.4)                      | 25.0 (8.7 – 49.1)                      | 39.4 (31.0 – 48.3)                |

Categorical variables are shown as percentages with counts in parentheses. Continuous variables are shown as medians with interquartile ranges. For lactate, ALT, AST, total bilirubin, and INR, the “worst values” were the highest laboratory values; for arterial pH, eGFR, and platelets, the “worst values” were the lowest laboratory values. Mortality outcomes are shown with absolute binomial 95% confidence intervals. Patients with unknown etiology of shock (n=26) are not included. (\*) Vasoactive medication use was not systematically collected for patients with distributive and hypovolemic shock. ALT indicates alanine aminotransferase; AST, aspartate aminotransferase; eGFR, estimated glomerular filtration rate;

ICU, intensive care unit; IQR, interquartile range; K/uL, thousand per microliter; LVEF, left ventricular ejection fraction; mg/dL, milligrams per deciliter; mmol/L, millimoles per liter; N/A, not applicable; No., number; U/L, units per liter.

**Supplemental Table 3a. Baseline characteristics of CICU patients without shock.**

|                                         | <b>CICU Patients Without Shock,<br/>% (n)</b> |
|-----------------------------------------|-----------------------------------------------|
|                                         | <b>N=2372</b>                                 |
| <i>Demographics</i>                     |                                               |
| Age, median (IQR), years                | 65 (55 – 75)                                  |
| Female sex                              | 37.3 (884)                                    |
| White race                              | 69.0 (1342)                                   |
| Weight, median (IQR), kg                | 83 (68 – 98)                                  |
| BMI, median (IQR), kg/m <sup>2</sup>    | 28 (24 – 33)                                  |
| <i>Cardiovascular Comorbidities</i>     |                                               |
| Current smoker                          | 20.0 (468)                                    |
| Diabetes mellitus                       | 33.2 (787)                                    |
| Hypertension                            | 67.3 (1597)                                   |
| Coronary artery disease                 | 41.0 (973)                                    |
| Cerebrovascular disease                 | 10.0 (238)                                    |
| Peripheral artery disease               | 9.1 (215)                                     |
| Prior heart failure                     | 31.9 (757)                                    |
| Historical LVEF                         |                                               |
| ≥50%                                    | 29.1 (212)                                    |
| 40-<50%                                 | 14.0 (102)                                    |
| 30-<40%                                 | 16.6 (121)                                    |
| 20-<30%                                 | 22.5 (164)                                    |
| <20%                                    | 17.8 (130)                                    |
| Prior heart transplant                  | 1.4 (33)                                      |
| Atrial fibrillation                     | 22.9 (544)                                    |
| Ventricular arrhythmia                  | 5.1 (121)                                     |
| Severe valvular disease                 | 14.0 (332)                                    |
| Pulmonary hypertension                  | 3.6 (85)                                      |
| Congenital heart disease                | 1.8 (43)                                      |
| <i>Non-cardiovascular comorbidities</i> |                                               |
| Chronic kidney disease                  | 21.8 (518)                                    |
| On dialysis                             | 22.6 (117)                                    |
| Significant pulmonary disease           | 13.4 (317)                                    |
| Significant liver disease               | 2.7 (63)                                      |

Categorical variables are shown as percentages with counts in parentheses. Continuous variables are shown as medians with interquartile ranges. BMI indicates body mass index; CICU, cardiac intensive care unit; IQR, interquartile range; kg, kilograms; kg/m<sup>2</sup>, kilograms per meter-squared; LVEF, left ventricular ejection fraction.

**Supplemental Table 3b. Presenting features, ICU resource utilization, and outcomes in CICU patients without shock.**

|                                                | <b>CICU Patients Without Shock,<br/>% (n)</b> |
|------------------------------------------------|-----------------------------------------------|
|                                                | <b>N=2372</b>                                 |
| <i>Illness severity</i>                        |                                               |
| SOFA score                                     | 2 (1 – 4)                                     |
| <i>“Worst” lab values</i>                      |                                               |
| Lactate, median (IQR), mmol/L                  | 1.6 (1.1 – 2.6)                               |
| Lactate >2.0 mmol/L                            | 36.4 (411)                                    |
| Arterial pH, median (IQR)                      | 7.37 (7.30 – 7.42)                            |
| Arterial pH <7.25                              | 10.8 (69)                                     |
| eGFR, median (IQR), mL/min/1.73 m <sup>2</sup> | 63 (39 – 85)                                  |
| eGFR <60 mL/min/1.73 m <sup>2</sup>            | 47.0 (961)                                    |
| ALT, median (IQR), U/L                         | 27 (18 - 46)                                  |
| AST, median (IQR), U/L                         | 34 (22 – 69)                                  |
| Total bilirubin, median (IQR), mg/dL           | 0.7 (0.5 – 1.0)                               |
| Platelets, median (IQR), K/uL                  | 183 (135 – 230)                               |
| INR, median (IQR)                              | 1.2 (1.1 – 1.4)                               |
| <i>ICU resource utilization</i>                |                                               |
| Days of ICU care, median (IQR)                 | 1.9 (1.0 – 3.6)                               |
| Mechanical ventilation                         | 12.1 (287)                                    |
| Renal replacement therapy                      | 2.7 (65)                                      |
| Invasive monitoring                            | 21.2 (504)                                    |
| Central venous line                            | 12.3 (292)                                    |
| Pulmonary artery catheter                      | 5.1 (120)                                     |
| Arterial line                                  | 13.5 (320)                                    |
| <i>Outcomes</i>                                |                                               |
| CICU mortality                                 | 2.7 (2.1 – 3.5)                               |
| In-hospital mortality                          | 4.6 (3.8 – 5.5)                               |

Categorical variables are shown as percentages with counts in parentheses. Continuous variables are shown as medians with interquartile ranges. For lactate, ALT, AST, total bilirubin, and INR, the “worst values” were the highest laboratory values; for arterial pH, eGFR, and platelets, the “worst values” were the lowest laboratory values. Mortality outcomes are shown with absolute binomial 95% confidence intervals. ALT indicates alanine aminotransferase; AST, aspartate aminotransferase; CICU, cardiac intensive care unit; eGFR, estimated glomerular filtration rate; ICU, intensive care unit; IQR, interquartile range; K/uL, thousand per microliter; LVEF, left ventricular ejection fraction; mg/dL, milligrams per deciliter; mmol/L, millimoles per liter; No., number; U/L, units per liter.

**Supplemental Table 4. Mortality by shock type excluding patients with initial cardiac arrest.**

|                       | <b>AMICS,<br/>% (95% CI)</b> | <b>CS Without AMI,<br/>% (95% CI)</b> | <b>Mixed,<br/>% (95% CI)</b> |
|-----------------------|------------------------------|---------------------------------------|------------------------------|
|                       | <b>N=94</b>                  | <b>N=244</b>                          | <b>N=98</b>                  |
| <i>Outcomes</i>       |                              |                                       |                              |
| CICU mortality        | 28.7 (19.9 – 39.0)           | 17.6 (13.1 – 23.0)                    | 23.5 (15.5 – 33.1)           |
| In-hospital mortality | 30.9 (21.7 – 41.2)           | 20.9 (16.0 – 26.5)                    | 36.7 (27.2 – 47.1)           |

Mortality outcomes are shown with absolute binomial 95% confidence intervals. AMI indicates acute myocardial infarction; AMICS, acute myocardial infarction cardiogenic shock; CICU, cardiac intensive care unit; CS, cardiogenic shock.

**Supplemental Table 5a. Baseline characteristics of cardiogenic shock (CS) patients treated vs. not treated with mechanical circulatory support (MCS).**

|                                         | <b>MCS Patients,<br/>% (n)<br/>N=165</b> | <b>Non-MCS Patients,<br/>% (n)<br/>N=285</b> |
|-----------------------------------------|------------------------------------------|----------------------------------------------|
| <i>Demographics</i>                     |                                          |                                              |
| Age, median (IQR), years                | 63 (54 – 72)                             | 65 (55 – 74)                                 |
| Female sex                              | 35.8 (59)                                | 36.5 (104)                                   |
| White race                              | 77.6 (114)                               | 63.7 (158)                                   |
| Weight, median (IQR), kg                | 85 (72 – 95)                             | 80 (68 – 97)                                 |
| BMI, median (IQR), kg/m <sup>2</sup>    | 28 (24 – 32)                             | 28 (23 – 32)                                 |
| <i>Cardiovascular Comorbidities</i>     |                                          |                                              |
| Current smoker                          | 20.7 (34)                                | 14.6 (41)                                    |
| Diabetes mellitus                       | 44.2 (73)                                | 37.5 (107)                                   |
| Hypertension                            | 58.2 (96)                                | 59.6 (170)                                   |
| Coronary artery disease                 | 43.0 (71)                                | 42.5 (121)                                   |
| Cerebrovascular disease                 | 12.1 (20)                                | 7.0 (20)                                     |
| Peripheral artery disease               | 9.1 (15)                                 | 10.9 (31)                                    |
| Prior heart failure                     | 38.2 (63)                                | 58.9 (168)                                   |
| Historical LVEF                         |                                          |                                              |
| ≥50%                                    | 12.7 (8)                                 | 10.4 (17)                                    |
| 40-<50%                                 | 6.3 (4)                                  | 7.4 (12)                                     |
| 30-<40%                                 | 6.3 (4)                                  | 12.9 (21)                                    |
| 20-<30%                                 | 38.1 (24)                                | 26.4 (43)                                    |
| <20%                                    | 36.5 (23)                                | 42.9 (70)                                    |
| Prior heart transplant                  | 1.2 (2)                                  | 0.7 (2)                                      |
| Atrial fibrillation                     | 17.0 (28)                                | 27.0 (77)                                    |
| Ventricular arrhythmia                  | 10.3 (17)                                | 9.1 (26)                                     |
| Severe valvular disease                 | 7.3 (12)                                 | 14.0 (40)                                    |
| Pulmonary hypertension                  | 4.8 (8)                                  | 8.4 (24)                                     |
| Congenital heart disease                | 0.6 (1)                                  | 1.8 (5)                                      |
| <i>Non-cardiovascular comorbidities</i> |                                          |                                              |
| Chronic kidney disease                  | 22.4 (37)                                | 37.5 (107)                                   |
| On dialysis                             | 21.6 (8)                                 | 12.1 (13)                                    |
| Significant pulmonary disease           | 12.7 (21)                                | 18.6 (53)                                    |
| Significant liver disease               | 3.6 (6)                                  | 4.6 (13)                                     |

Categorical variables are shown as percentages with counts in parentheses. Continuous variables are shown as medians with interquartile ranges. BMI indicates body mass index; IQR, interquartile range; kg, kilograms; kg/m<sup>2</sup>, kilograms per meter-squared; LVEF, left ventricular ejection fraction; MCS, mechanical circulatory support.

**Supplemental Table 5b. Management, resource utilization, and outcomes in cardiogenic shock (CS) patients treated vs. not treated with mechanical circulatory support (MCS).**

|                                                | <b>MCS Patients,<br/>% (n)<br/>N=165</b> | <b>Non-MCS Patients,<br/>% (n)<br/>N=286</b> |
|------------------------------------------------|------------------------------------------|----------------------------------------------|
| <i>Illness severity</i>                        |                                          |                                              |
| SOFA score                                     | 9 (5 – 12)                               | 7 (5 – 10)                                   |
| <i>“Worst” lab values</i>                      |                                          |                                              |
| Lactate, median (IQR), mmol/L                  | 3.7 (2.0 – 9.3)                          | 2.9 (1.8 – 5.7)                              |
| Lactate >2.0 mmol/L                            | 73.2 (104)                               | 67.5 (156)                                   |
| Arterial pH, median (IQR)                      | 7.32 (7.19 – 7.40)                       | 7.37 (7.23 – 7.44)                           |
| Arterial pH <7.25                              | 35.7 (45)                                | 27.6 (47)                                    |
| eGFR, median (IQR), mL/min/1.73 m <sup>2</sup> | 40 (22 – 61)                             | 38 (20 – 55)                                 |
| eGFR <60 mL/min/1.73 m <sup>2</sup>            | 73.3 (110)                               | 79.7 (212)                                   |
| ALT, median (IQR), U/L                         | 83 (38 – 426)                            | 58 (25 – 231)                                |
| AST, median (IQR), U/L                         | 183 (65 – 797)                           | 82 (30 – 321)                                |
| Total bilirubin, median (IQR), mg/dL           | 1.2 (0.8 – 2.0)                          | 1.2 (0.7 – 1.8)                              |
| Platelets, median (IQR), K/uL                  | 121 (77 – 172)                           | 150 (109 – 216)                              |
| INR, median (IQR)                              | 1.5 (1.2 – 2.0)                          | 1.4 (1.2 – 2.0)                              |
| <i>ICU resource utilization</i>                |                                          |                                              |
| Days of ICU care, median (IQR)                 | 5.5 (2.9 – 10.5)                         | 3.7 (2.1 – 7.1)                              |
| Mechanical ventilation                         | 64.8 (107)                               | 40.6 (116)                                   |
| Renal replacement therapy                      | 18.8 (31)                                | 12.2 (35)                                    |
| Invasive monitoring                            | 81.2 (134)                               | 61.5 (176)                                   |
| Central venous line                            | 61.2 (101)                               | 38.5 (110)                                   |
| Pulmonary artery catheter                      | 43.0 (71)                                | 31.8 (91)                                    |
| Arterial line                                  | 64.8 (107)                               | 45.3 (129)                                   |
| <i>Management of shock</i>                     |                                          |                                              |
| No. of vasoactive medications, median (IQR)    | 2 (1 – 3)                                | 1 (1 – 2)                                    |
| Mechanical circulatory support                 | 100.0 (165)                              | 0.0 (0)                                      |
| <i>Outcomes</i>                                |                                          |                                              |
| CICU mortality                                 | 34.5 (27.3 – 42.3)                       | 25.6 (20.6 – 31.1)                           |
| In-hospital mortality                          | 40.0 (32.5 – 47.9)                       | 27.7 (22.6 – 33.3)                           |

Categorical variables are shown as percentages with counts in parentheses. Continuous variables are shown as medians with interquartile ranges. For lactate, ALT, AST, total bilirubin, and INR, the “worst values” were the highest laboratory values; for arterial pH, eGFR, and platelets, the “worst values” were the lowest laboratory values. Mortality outcomes are shown with absolute binomial 95% confidence intervals. ALT indicates alanine aminotransferase; AST, aspartate aminotransferase; CICU, cardiac intensive care unit; CS, cardiogenic shock; ICU, intensive care unit; IQR, interquartile range; K/uL, thousand per microliter; LVEF, left ventricular ejection fraction; mg/dL, milligrams per deciliter; mmol/L, millimoles per liter; No., number; U/L, units per liter.

**Supplemental Table 6a. Sensitivity analysis restricted to cardiogenic shock (CS) patients with invasive hemodynamic assessment: clinical characteristics.**

|                                         | <b>CS Patients with PA Catheters, % (n)</b> | <b>All CS Patients, % (n)</b> | <b>Mixed Shock Patients with PA Catheters, % (n)</b> | <b>All Mixed Shock Patients, % (n)</b> |
|-----------------------------------------|---------------------------------------------|-------------------------------|------------------------------------------------------|----------------------------------------|
|                                         | <b>N=214</b>                                | <b>N=450</b>                  | <b>N=55</b>                                          | <b>N=132</b>                           |
| <i>Demographics</i>                     |                                             |                               |                                                      |                                        |
| Age, median (IQR), years                | 63 (55 – 72)                                | 64 (55 – 74)                  | 65 (55 – 69)                                         | 65 (54 – 75)                           |
| Female sex                              | 32.7 (70)                                   | 36.2 (163)                    | 38.2 (21)                                            | 37.1 (49)                              |
| White race                              | 72.3 (138)                                  | 68.9 (272)                    | 67.4 (31)                                            | 66.7 (74)                              |
| Weight, median (IQR), kg                | 84 (71 – 94)                                | 82 (69 – 96)                  | 83.0 (71 – 98)                                       | 82 (68 – 98)                           |
| BMI, median (IQR), kg/m <sup>2</sup>    | 28 (24 – 32)                                | 28 (24 – 32)                  | 29 (25 – 35)                                         | 28 (24 – 34)                           |
| <i>Cardiovascular Comorbidities</i>     |                                             |                               |                                                      |                                        |
| Current smoker                          | 14.7 (31)                                   | 16.9 (75)                     | 11.1 (6)                                             | 11.5 (15)                              |
| Diabetes mellitus                       | 43.0 (92)                                   | 40.0 (180)                    | 50.9 (28)                                            | 44.7 (59)                              |
| Hypertension                            | 58.4 (125)                                  | 59.1 (266)                    | 60.0 (33)                                            | 60.6 (80)                              |
| Coronary artery disease                 | 42.5 (91)                                   | 42.7 (192)                    | 56.4 (31)                                            | 47.0 (62)                              |
| Cerebrovascular disease                 | 8.9 (19)                                    | 8.9 (40)                      | 9.1 (5)                                              | 7.6 (10)                               |
| Peripheral artery disease               | 8.4 (18)                                    | 10.2 (46)                     | 16.4 (9)                                             | 11.4 (15)                              |
| Prior heart failure                     | 58.4 (125)                                  | 51.3 (231)                    | 58.2 (32)                                            | 54.5 (72)                              |
| Historical LVEF                         |                                             |                               |                                                      |                                        |
| ≥50%                                    | 12.1 (15)                                   | 11.1 (25)                     | 22.6 (7)                                             | 19.7 (13)                              |
| 40-<50%                                 | 6.5 (8)                                     | 7.1 (16)                      | 3.2 (1)                                              | 4.5 (3)                                |
| 30-<40%                                 | 5.6 (7)                                     | 11.1 (25)                     | 16.1 (5)                                             | 15.2 (10)                              |
| 20-<30%                                 | 33.9 (42)                                   | 29.6 (67)                     | 29.0 (9)                                             | 31.8 (21)                              |
| <20%                                    | 41.9 (52)                                   | 41.2 (93)                     | 29.0 (9)                                             | 28.8 (19)                              |
| Prior heart transplant                  | 1.9 (4)                                     | 0.9 (4)                       | 7.3 (4)                                              | 3.8 (5)                                |
| Atrial fibrillation                     | 26.2 (56)                                   | 23.3 (105)                    | 25.5 (14)                                            | 27.3 (36)                              |
| Ventricular arrhythmia                  | 11.7 (25)                                   | 9.6 (43)                      | 9.1 (5)                                              | 8.3 (11)                               |
| Severe valvular disease                 | 14.5 (31)                                   | 11.6 (52)                     | 32.7 (18)                                            | 26.5 (35)                              |
| Pulmonary hypertension                  | 6.1 (13)                                    | 7.1 (32)                      | 3.6 (2)                                              | 3.8 (5)                                |
| Congenital heart disease                | 0.9 (2)                                     | 1.3 (6)                       | 1.8 (1)                                              | 3.0 (4)                                |
| <i>Non-cardiovascular comorbidities</i> |                                             |                               |                                                      |                                        |
| Chronic kidney disease                  | 36.4 (78)                                   | 32.0 (144)                    | 41.8 (23)                                            | 35.6 (47)                              |
| On dialysis                             | 12.8 (10)                                   | 14.6 (21)                     | 26.1 (6)                                             | 42.6 (20)                              |
| Significant pulmonary disease           | 14.5 (31)                                   | 16.4 (74)                     | 12.7 (7)                                             | 13.6 (18)                              |
| Significant liver disease               | 2.8 (6)                                     | 4.2 (19)                      | 5.5 (3)                                              | 6.8 (9)                                |

Categorical variables are shown as percentages with counts in parentheses. Continuous variables are shown as medians with interquartile ranges. BMI indicates body mass index; IQR, interquartile range; kg, kilograms; kg/m<sup>2</sup>, kilograms per meter-squared; LVEF, left ventricular ejection fraction.

**Supplemental Table 6b. Sensitivity analysis restricted to cardiogenic shock (CS) patients with invasive hemodynamic assessment: management, resource utilization, and outcomes.**

|                                                | <b>CS Patients with PA Catheters, % (n)</b> | <b>All CS Patients, % (n)</b> | <b>Mixed Shock Patients with PA Catheters, % (n)</b> | <b>Mixed, % (n)</b> |
|------------------------------------------------|---------------------------------------------|-------------------------------|------------------------------------------------------|---------------------|
|                                                | <b>N=214</b>                                | <b>N=450</b>                  | <b>N=55</b>                                          | <b>N=132</b>        |
| <i>Illness severity</i>                        |                                             |                               |                                                      |                     |
| SOFA score                                     | 7 (5 – 11)                                  | 8 (5 – 11)                    | 9 (7 – 13)                                           | 10 (6 – 13)         |
| <i>“Worst” lab values</i>                      |                                             |                               |                                                      |                     |
| Lactate, median (IQR), mmol/L                  | 2.8 (1.9 – 5.9)                             | 3.1 (1.9 – 6.5)               | 4.5 (2.7 – 8.1)                                      | 4.2 (2.4 – 8.1)     |
| Lactate >2.0 mmol/L                            | 66.7 (124)                                  | 69.7 (260)                    | 88.2 (45)                                            | 81.1 (103)          |
| Arterial pH, median (IQR)                      | 7.36 (7.24 – 7.42)                          | 7.34 (7.21 – 7.43)            | 7.27 (7.21 – 7.38)                                   | 7.29 (7.21 – 7.40)  |
| Arterial pH <7.25                              | 26.8 (41)                                   | 31.1 (92)                     | 33.3 (15)                                            | 35.3 (36)           |
| eGFR, median (IQR), mL/min/1.73 m <sup>2</sup> | 37 (19 – 53)                                | 38 (20 – 57)                  | 27 (15 – 38)                                         | 31 (14 – 45)        |
| eGFR <60 mL/min/1.73 m <sup>2</sup>            | 81.3 (165)                                  | 77.4 (322)                    | 94.3 (50)                                            | 83.3 (105)          |
| ALT, median (IQR), U/L                         | 65 (31 – 295)                               | 64 (29 – 295)                 | 114 (39 – 708)                                       | 73 (30 – 370)       |
| AST, median (IQR), U/L                         | 101 (37 – 524)                              | 113 (37 – 473)                | 164 (41 – 1053)                                      | 112 (40 – 664)      |
| Total bilirubin, median (IQR), mg/dL           | 1.2 (0.8 – 2.1)                             | 1.2 (0.7 – 1.9)               | 1.6 (0.9 – 3.3)                                      | 1.3 (0.7 – 2.7)     |
| Platelets, median (IQR), K/uL                  | 129 (94 – 189)                              | 138 (98 – 200)                | 103 (58 – 148)                                       | 116 (62 – 174)      |
| INR, median (IQR)                              | 1.5 (1.2 – 1.9)                             | 1.4 (1.2 – 2.0)               | 1.8 (1.3 – 3.1)                                      | 1.7 (1.3 – 2.8)     |
| <i>ICU resource utilization</i>                |                                             |                               |                                                      |                     |
| Days of ICU care, median (IQR)                 | 5.5 (2.6 – 10.4)                            | 4.2 (2.2 – 8.4)               | 7.2 (4.5 – 15.2)                                     | 5.8 (2.9 – 10.0)    |
| Mechanical ventilation                         | 48.6 (104)                                  | 49.6 (223)                    | 70.9 (39)                                            | 65.9 (87)           |
| Renal replacement therapy                      | 15.9 (34)                                   | 14.7 (66)                     | 34.5 (19)                                            | 26.5 (35)           |
| Invasive monitoring                            | 86.9 (186)                                  | 68.9 (310)                    | 89.1 (49)                                            | 67.4 (89)           |
| Central venous line                            | 53.7 (115)                                  | 46.9 (211)                    | 70.9 (39)                                            | 54.5 (72)           |
| Pulmonary artery catheter                      | 75.7 (162)                                  | 36.0 (162)                    | 74.5 (41)                                            | 31.1 (41)           |
| Arterial line                                  | 63.6 (136)                                  | 52.4 (236)                    | 85.5 (47)                                            | 59.8 (79)           |
| <i>Management of shock</i>                     |                                             |                               |                                                      |                     |
| No. of vasoactive medications, median (IQR)    | 2 (1 – 2)                                   | 1 (1 – 2)                     | 2 (2 – 3)                                            | 2 (1 – 3)           |
| Mechanical circulatory support                 | 45.3 (97)                                   | 36.7 (165)                    | 41.8 (23)                                            | 22.7 (30)           |
| <i>Outcomes</i>                                |                                             |                               |                                                      |                     |
| CICU mortality                                 | 26.6 (20.8 – 33.1)                          | 28.9 (24.7 – 33.3)            | 27.3 (16.1 – 41.0)                                   | 28.8 (21.2 – 37.3)  |
| In-hospital mortality                          | 30.4 (24.3 – 37.0)                          | 32.2 (27.9 – 36.8)            | 38.2 (25.4 – 52.3)                                   | 39.4 (31.0 – 48.3)  |

Categorical variables are shown as percentages with counts in parentheses. Continuous variables are shown as medians with interquartile ranges. For lactate, ALT, AST, total bilirubin, and INR, the “worst values” were the highest laboratory values; for arterial pH, eGFR, and platelets, the “worst values” were the lowest laboratory values. Mortality outcomes are shown with absolute binomial 95% confidence intervals. ALT indicates alanine aminotransferase; AST, aspartate aminotransferase; CICU, cardiac intensive care unit; CS, cardiogenic shock; ICU, intensive care unit; IQR, interquartile range; K/uL, thousand per microliter; LVEF, left ventricular ejection fraction; mg/dL, milligrams per deciliter; mmol/L, millimoles per liter; No., number; PA, pulmonary artery; U/L, units per liter.
